# Supplementary material for: Cyclic AMP signaling restricts activation and promotes maturation and antioxidant defenses in astrocytes
Source: PubMed Central journal article supplement (PMC4842285; doi:10.1186/s12864-016-2623-4), 2016-04-23
Supplement: 12864_2016_2623_MOESM2_ESM.pdf [file 12864_2016_2623_MOESM2_ESM.pdf]

# Supplementary Figure 1

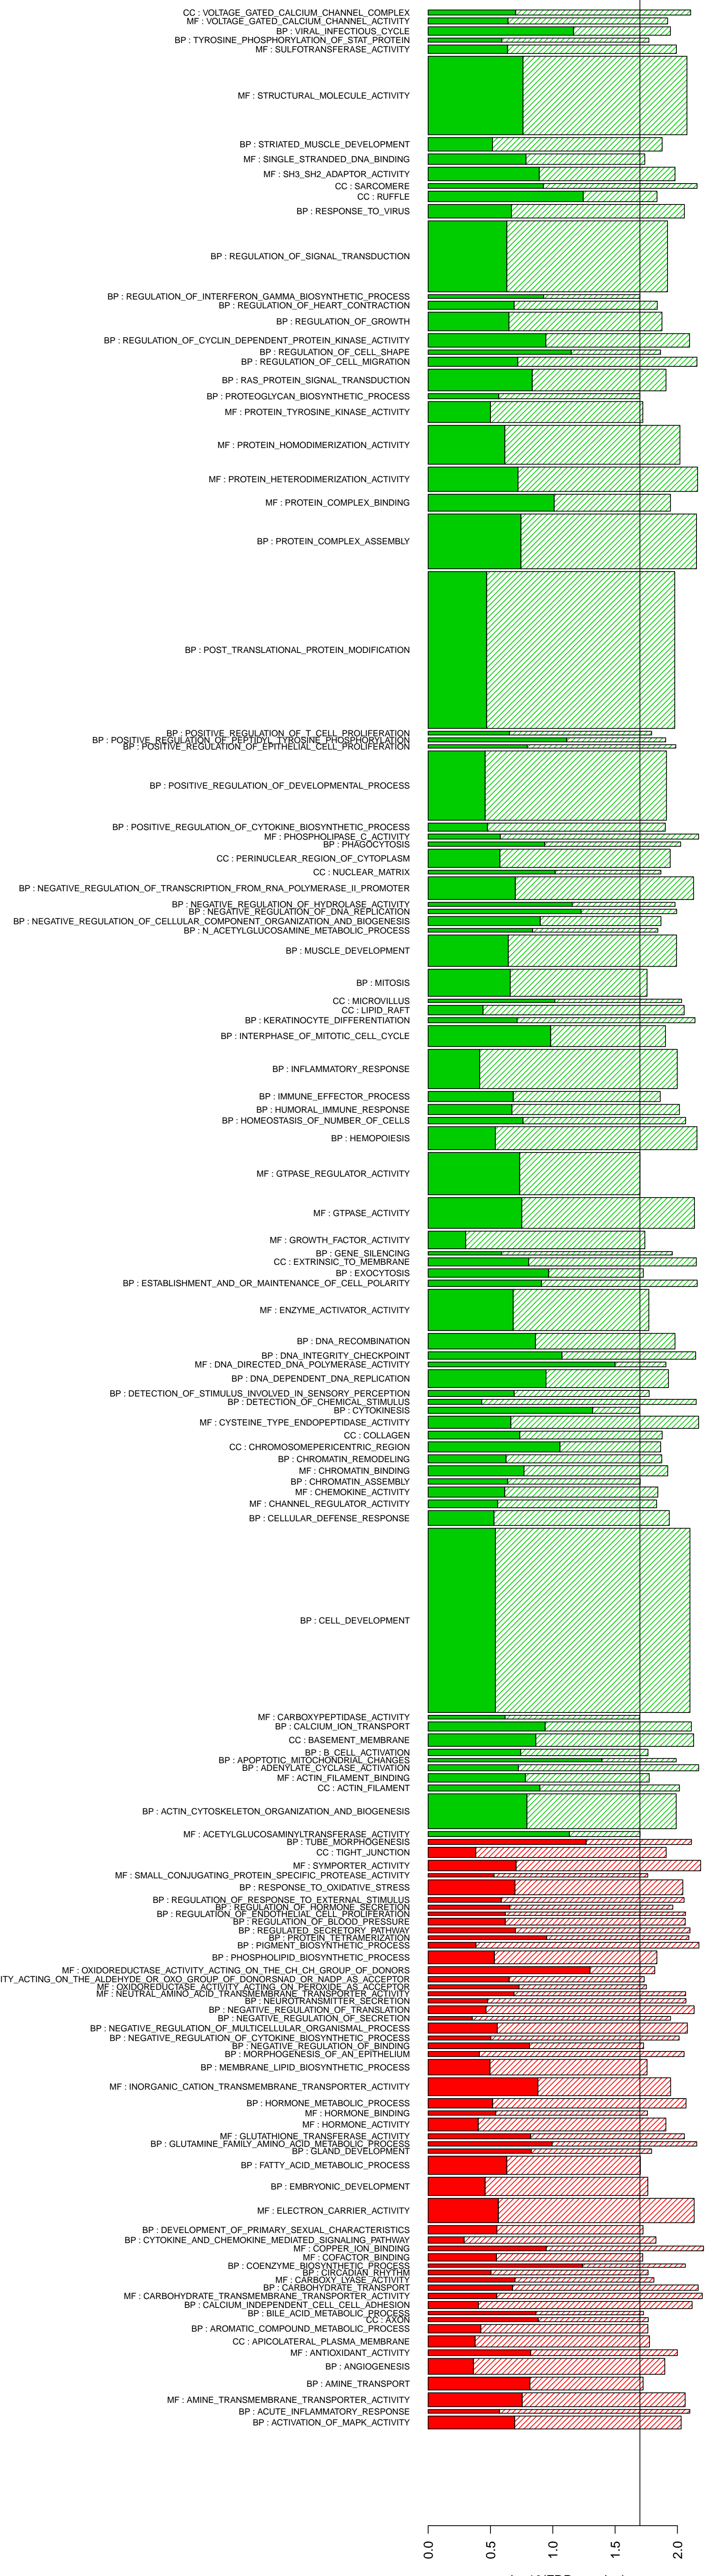

0.0 0.5 1.0 1.5 2.0

$-\log_{10}(\text{FDR } q\text{-value})$
